# Supplementary material for: Easy access to trans-2,3-disubstituted cyclobutanones, 2,4,5-trisubstituted 3,6-dihydro-2H-pyrans and cis-substituted phenylcyclopropylsulfones by using the highly versatile 1-phenylsulfenyl- or 1-phenylsulfonyl-cyclopropylketones
Source: Royal Society of Chemistry journal article supplement (doi:10.1039/b906695k), 2009-01-01

## **ELECTRONIC SUPPLEMENTARY INFORMATION**

### **Easy access to *trans* 2,3-disubstituted cyclobutanones, 2,4,5 trisubstituted 3,6-dihydro 2H-pyrans and *cis*-substituted phenyl cyclopropyl sulfones by using the highly versatile 1-phenylsulfenyl- or 1-phenylsulfonyl-cyclopropyl ketones.**

**Guido Alberti, Angela M. Bernard, Costantino Floris, Angelo Frongia, Pier P. Piras,\* Francesco Secci and Marco Spiga**

*Dipartimento di Scienze Chimiche, Università di Cagliari, Complesso Universitario di Monserrato, S.S 554 Bivio per Sestu, I 09042, Monserrato (Cagliari), Italy. Tel.: +39 0706754410. Fax: +39 0706754388. E-mail: pppiras@unica.it*

#### **Analytical data of 1b, 1c, 1e, 1f, 1j, 1k.**

##### **(Z)-4-methyl-1-phenyl-2-(phenylthio)pent-2-en-1-one 1b**

Yellow oil. Yield 72%. IR (neat): 1670 cm<sup>-1</sup>. <sup>1</sup>H NMR (CDCl<sub>3</sub>) δ: 1.13 (d, 6H, J = 6Hz), 3.21-3.29 (m, 1H), 6.53 (d, 1H, J = 9Hz), 7.10-7.71 (m, 10H). <sup>13</sup>C NMR δ: 21.96, 30.07, 126.61, 128.07, 128.88, 129.36, 129.89, 132.26, 132.28, 133.28, 134.35, 155.52, 193.98. MS m/z: 282 (M<sup>+</sup>(80)), 267 (3), 239 (2), 211 (4), 172 (10), 145 (20), 121 (25), 105 (65), 77 (100). Anal. Calcd. for C<sub>18</sub>H<sub>18</sub>OS: C, 76.56; H, 6.42; S, 11.35. Found: C, 76.49; H, 6.38; S, 11.30.

##### **(Z)-6-phenyl-3-(phenylthio)hex-3-en-2-one 1c**

Yellow oil. Yield 79%. IR (neat): 1690 cm<sup>-1</sup>. <sup>1</sup>H NMR (CDCl<sub>3</sub>) δ: 2.24 (s, 3H), 2.71-2.88 (m, 4H), 7.03-7.31 (m, 11H). <sup>13</sup>C NMR δ: 27.48, 32.37, 34.52, 126.06, 126.25, 127.67, 128.28, 128.39, 128.50, 128.57, 129.17, 135.17, 150.26, 194.53. MS m/z: 282 (M<sup>+</sup>(44)), 239 (3), 191 (17), 163 (11), 147 (17), 129 (26), 109 (15), 91 (100), 65 (35), 51 (20). Anal. Calcd. for C<sub>18</sub>H<sub>18</sub>OS: C, 76.56; H, 6.42; S, 11.35. Found: C, 76.52; H, 6.36; S, 11.28.

##### **(Z)-1-phenyl-4-(phenylthio)non-3-en-5-one 1e**

Yellow oil. Yield 50%. IR (neat): 1680 cm<sup>-1</sup>. <sup>1</sup>H NMR (CDCl<sub>3</sub>) δ: 0.79 (t, 3H, J = 7.2 Hz), 0.85-0.94 (m, 2H), 1.11-1.60 (m, 4H), 2.52-2.60 (m, 2H), 2.82-2.84 (m, 2H), 7.04-7.30 (m, 11H). <sup>13</sup>C NMR (CDCl<sub>3</sub>) δ: 13.78, 22.12, 26.31, 32.25, 34.55, 39.09, 126.00, 126.21, 127.69, 128.41, 128.47, 129.12, 135.11, 135.64, 140.58, 149.26, 200.15. MS m/z: 324 (M<sup>+</sup>(80)), 267 (5), 233 (45), 215 (3), 172 (16), 128 (46), 109 (18), 91 (100). Anal. Calcd. for C<sub>21</sub>H<sub>24</sub>OS: C, 77.73; H, 7.46; S, 9.88. Found: C, 77.75; H, 7.58; S, 9.75.

##### **(Z)-3-(Phenylthio)oct-2-en-4-one 1f**

The instability of this product precluded its purification by chromatography, but confirmation of the structure arises from GC MS, IR and <sup>1</sup>H NMR of the crude mixture. IR (neat): 1670 cm<sup>-1</sup>. <sup>1</sup>H NMR (CDCl<sub>3</sub>) δ: 0.87 (t, 3H, J = 5.7 Hz), 1.20-1.34 (m, 4H), 1.91 (d, 3H, J = 5.4 Hz), 2.58 (t, 2H, J = 5.7 Hz), 6.22 (m, 1H), 7.14-7.37 (m, 5H). MS m/z: 234 (M<sup>+</sup>(72)), 219 (8), 192 (4), 177 (14), 149 (100), 134 (84), 115 (64), 109 (55), 77 (32).

##### **(Z)-3-(phenylthio)-4-(thiophen-2-yl)but-3-en-2-one 1j**

Orange oil. Yield 90%. IR (neat): 1670 cm<sup>-1</sup>. <sup>1</sup>H NMR (CDCl<sub>3</sub>) δ: 2.38 (s, 3H), 7.10-7.79 (m, 8H), 8.35 (s, 1H). <sup>13</sup>C NMR δ: 27.53, 126.27, 126.69, 127.00, 127.25, 129.33, 133.20, 135.00, 136.94, 140.21, 182.93, 197.99. MS m/z: 260 (M<sup>+</sup>(98)), 245 (2), 217 (44), 184 (100), 158 (4), 140 (35), 121 (12), 96 (32), 69 (25), 51 (41). Anal. Calcd. for C<sub>14</sub>H<sub>12</sub>OS<sub>2</sub>: C, 64.58; H, 4.65; S, 24.63. Found: C, 64.52; H, 4.61; S, 24.58.

##### **(Z)-4-(naphthalen-3-yl)-3-(phenylthio)but-3-en-2-one 1k**

Orange oil. Yield 86%. IR (neat): 1680 cm<sup>-1</sup>. <sup>1</sup>H NMR (CDCl<sub>3</sub>) δ: 2.37 (s, 3H), 7.18-8.28 (m, 12H). <sup>13</sup>C NMR δ: 27.69, 126.43, 126.48, 127.13, 127.44, 127.61, 127.84, 127.92, 129.14, 129.41, 131.81, 132.02, 132.37, 132.91, 135.38, 144.38, 199.02. MS m/z: 304 (M<sup>+</sup>(100)), 289 (2), 261 (48), 245 (8), 228 (54), 211 (19), 184 (40), 166 (8), 152 (76), 126 (15), 109 (10), 93 (6), 77 (30), 51 (37). Anal. Calcd. for C<sub>20</sub>H<sub>16</sub>OS: C, 78.91; H, 5.30; S, 10.53. Found: C, 78.86; H, 5.25; S, 10.50.

## **Analytical data of 2b, 2c, 2e, 2f, 2g, 2j, 2k.**

### **(2-isopropyl-1-(phenylthio)cyclopropyl)(phenyl)methanone 2b**

Yellow oil. Yield 71%. IR (neat): 1690  $\text{cm}^{-1}$ .  $^1\text{H}$  NMR ( $\text{CDCl}_3$ )  $\delta$ : 0.92 (dd, 1H,  $J = 7.2$  Hz,  $J = 4.5$  Hz), 1.11 (d, 3H,  $J = 6.6$  Hz), 1.26 (d, 3H,  $J = 6.6$  Hz), 1.42-1.51 (m, 1H), 1.91-1.99 (m, 1H), 2.30 (dd, 1H,  $J = 9.0$  Hz,  $J = 4.5$  Hz), 7.07-7.93 (10H).  $^{13}\text{C}$  NMR  $\delta$ : 21.96, 22.25, 22.61, 30.28, 38.52, 39.99, 125.70, 127.69, 127.76, 127.86, 128.76, 129.04, 132.10, 136.48, 199.80. MS  $m/z$ : 296 ( $\text{M}^+$  (31)), 240 (6), 211 (7), 191 (10), 171 (7), 135 (21), 105 (100), 77 (98). Anal. Calcd. for  $\text{C}_{19}\text{H}_{20}\text{OS}$ : C, 76.99; H, 6.80; S, 10.82. Found: C, 76.78; H, 6.78; S, 10.79.

### **1-(2-phenethyl-1-(phenylthio)cyclopropyl)ethanone 2c**

Yellow oil. Yield 73%. IR (neat): 1690  $\text{cm}^{-1}$ .  $^1\text{H}$  NMR ( $\text{CDCl}_3$ )  $\delta$ : 0.94-0.97 (m, 1H), 1.94-2.05 (m, 4H), 2.40 (s, 3H), 2.72 (t, 2H,  $J = 7.5$  Hz), 7.11-7.29 (m, 10H).  $^{13}\text{C}$  NMR  $\delta$ : 27.29, 28.32, 31.56, 33.46, 35.54, 38.91, 125.28, 125.74, 125.96, 128.37, 128.43, 129.07, 137.07, 141.33, 208.47. MS  $m/z$ : 296 ( $\text{M}^+$  (32)), 253 (3), 205 (3), 179 (4), 135 (24), 117 (16), 91 (100), 65 (28). Anal. Calcd. for  $\text{C}_{19}\text{H}_{20}\text{OS}$ : C, 76.99; H, 6.80; S, 10.82. Found: C, 76.84; H, 6.72; S, 10.75.

**1-(2-phenethyl-1-(phenylthio)cyclopropyl)pentan-1-one 2e** Yellow oil. Yield 91 %. IR (neat): 1680  $\text{cm}^{-1}$ .  $^1\text{H}$  NMR ( $\text{CDCl}_3$ )  $\delta$ : 0.86 (t, 3H,  $J = 7.5$  Hz), 0.89-0.94 (m, 1H), 1.19-1.31 (m, 2H), 1.44-1.56 (m, 2H), 1.88-2.04 (m, 4H), 2.70-2.79 (m, 2H), 2.81-2.86 (m, 2H), 7.10-7.30 (m, 10H).  $^{13}\text{C}$  NMR ( $\text{CDCl}_3$ )  $\delta$ : 13.84, 22.19, 26.40, 26.90, 31.58, 33.29, 35.56, 38.65, 39.75, 125.29, 125.69, 125.97, 128.38, 128.39, 129.03, 137.29, 141.41, 208.47. MS  $m/z$ : 338 ( $\text{M}^+$  (74)), 305 (3), 253 (8), 161 (6), 143 (16), 143 (14), 117 (25), 109 (24), 91 (100), 77 (11). Anal. Calcd. for  $\text{C}_{22}\text{H}_{26}\text{OS}$ : C, 78.06; H, 7.74; S, 9.47. Found: C, 78.02; H, 7.78; S, 9.45.

**1-(2-methyl-1-(phenylthio)cyclopropyl)pentan-1-one 2f** Colourless oil. Yield 90 %. IR (neat): 1680  $\text{cm}^{-1}$ .  $^1\text{H}$  NMR ( $\text{CDCl}_3$ )  $\delta$ : 0.83 (t, 3H,  $J = 7.2$  Hz), 0.92 (dd, 1H,  $J = 7.5$  Hz,  $J = 3.9$  Hz), 1.16-1.26 (m, 2H), 1.30 (d, 3H,  $J = 6.3$  Hz), 1.44-1.57 (m, 3H), 1.66 (dd, 1H,  $J = 1.5$  Hz,  $J = 6.3$  Hz), 1.89 (dd, 1H,  $J = 9.0$  Hz,  $J = 3.9$  Hz), 2.05-2.09 (m, 1H), 2.79-2.88 (m, 2H), 7.10-7.28 (m, 5H).  $^{13}\text{C}$  NMR ( $\text{CDCl}_3$ )  $\delta$ : 13.82, 14.34, 22.16, 26.38, 27.01, 28.21, 39.69, 39.83, 125.03, 125.40, 125.61, 128.97, 137.43, 209.09. MS  $m/z$ : 248 ( $\text{M}^+$  (100)), 233 (4), 215 (18), 191 (12), 163 (98), 147 (28), 121 (98), 109 (68), 105 (31), 85 (90), 77 (48). Anal. Calcd. for  $\text{C}_{15}\text{H}_{20}\text{OS}$ : C, 72.54; H, 8.12; S, 12.91. Found: C, 72.74; H, 8.18; S, 12.85.

### **1-(2-furan-2-yl)-1-(phenylthio)cyclopropyl)ethanone 2g**

Yellow oil. Yield 70%. IR (neat): 1680  $\text{cm}^{-1}$ .  $^1\text{H}$  NMR ( $\text{CDCl}_3$ )  $\delta$ : 1.72 (dd, 1H,  $J = 7.5$  Hz,  $J = 4.5$  Hz), 2.35 (dd, 1H,  $J = 9.9$  Hz,  $J = 4.5$  Hz), 2.45 (s, 3H), 3.16 (dd, 1H,  $J = 9.0$  Hz,  $J = 8.1$  Hz), 6.15 (d, 1H,  $J = 3.3$  Hz), 6.24-6.30 (m, 1H), 7.12 (d,  $J = 5.1$  Hz), 7.20-7.43 (m, 5H).  $^{13}\text{C}$  NMR  $\delta$ : 24.89, 28.53, 30.25, 57.77, 108.95, 110.44, 126.29, 128.96, 129.36, 134.41, 142.07, 148.03, 177.86. MS  $m/z$ : 258 ( $\text{M}^+$  (100)), 229 (28), 213 (14), 181 (8), 153 (6), 137 (21), 109 (18), 77 (26). Anal. Calcd. for  $\text{C}_{15}\text{H}_{14}\text{O}_2\text{S}$ : C, 69.74; H, 5.46; S, 12.41. Found: C, 69.59; H, 5.58; S, 12.49.

### **1-(1-phenylthio)-2-(thiophen-2-yl)cyclopropyl)ethanone 2j**

Yellow oil. Yield 76%. IR (neat): 1680  $\text{cm}^{-1}$ .  $^1\text{H}$  NMR ( $\text{CDCl}_3$ )  $\delta$ : 1.67 (dd, 1H,  $J = 7.5$  Hz,  $J = 4.5$  Hz), 2.48 (s, 3H), 2.49 (dd, 1H,  $J = 9.0$  Hz,  $J = 4.5$  Hz), 3.29 (dd, 1H,  $J = 7.8$  Hz,  $J = 9.3$  Hz), 6.89-6.94 (m, 2H), 6.24-6.30 (m, 2H), 7.11-7.28 (m, 6H).  $^{13}\text{C}$  NMR  $\delta$ : 27.42, 28.58, 32.35, 42.21, 124.94, 125.55, 126.31, 126.65, 127.20, 129.01, 136.25, 139.32, 206.20. MS  $m/z$ : 274 ( $\text{M}^+$  (100)), 256 (2), 231 (18), 216 (2), 197 (10), 153 (57), 137 (11), 121 (72), 109 (21), 77 (33). Anal. Calcd. for  $\text{C}_{15}\text{H}_{14}\text{OS}_2$ : C, 65.66; H, 5.14; S, 23.37. Found: C, 65.44; H, 5.37; S, 23.48.

### **1-(2-(naphthalene-3-yl)-1-(phenylthio)cyclopropyl)ethanone 2k**

Yellow oil. Yield 80 %. IR (neat): 1680  $\text{cm}^{-1}$ .  $^1\text{H}$  NMR ( $\text{CDCl}_3$ )  $\delta$ : 1.91 (dd, 1H,  $J = 7.8$  Hz,  $J = 4.5$  Hz), 2.51 (s, 3H), 2.56 (dd, 1H,  $J = 9.0$  Hz,  $J = 4.5$  Hz), 3.29 (t, 1H,  $J = 8.7$  Hz), 7.05-7.81 (m, 5H).  $^{13}\text{C}$  NMR  $\delta$ : 24.96, 28.45, 37.98, 41.68, 125.38, 125.90, 126.11, 127.24, 127.52, 127.63, 127.78, 128.14, 128.96, 132.68, 132.76, 132.97, 136.54, 234.78. MS  $m/z$ : 318 ( $\text{M}^+$  (32)), 303 (4), 239 (6), 197 (25), 165 (100), 128 (28), 109 (34), 77 (45). Anal. Calcd. for  $\text{C}_{21}\text{H}_{18}\text{OS}$ : C, 79.21; H, 5.70; S, 10.67. Found: C, 79.34; H, 5.49; S, 10.82.

## **General method for reduction of ketones 2a-g.**

To a solution of the ketone **2a-g** (6.23 mmol) in THF (30 mL) was added a solution of  $\text{LiAlH}_4$  (2.0 M in THF, 4.67 mL, 9.35 mmol) and the mixture was stirred at  $-78$   $^\circ\text{C}$  for 1 h. The resulting mixture was diluted with diethyl ether, treated with wet  $\text{Na}_2\text{SO}_4$ . The organic layer was filtered and washed with brine, dried ( $\text{Na}_2\text{SO}_4$ ), and evaporated. The residue purified by column chromatography (silica gel; light petroleum-diethyl ether 10:1) give a *syn/anti* mixture of the **6a-g** products, the ratio of which was determined by  $^1\text{H}$  NMR analysis and GC MS. The results are summarized in Tables 1.

### **1-(2-isopropyl-1-(phenylthio)cyclopropyl)ethanol 6a**

Inseparable 85/15 *syn/anti* mixture. Colourless oil. Yield 96 %. IR (neat): 3400  $\text{cm}^{-1}$ .  $^1\text{H}$  NMR ( $\text{CDCl}_3$ )  $\delta$ : 0.63-0.77 (m, 2H), 0.85-0.98 (m, 2H), 1.02 (d, 6H,  $J = 6.9$  Hz), 1.06 (d, 6H,  $J = 6.6$  Hz), 1.25 (d, 3H,  $J = 6.3$  Hz), 1.29 (d, 3H,  $J = 6.3$  Hz), 1.24-1.31 (m, 1H), 1.33-1.38 (m, 1H), 1.57-1.67 (m, 2H), 1.94 (d, 2H,  $J = 8.1$  Hz), 3.29 (dq, 1H,  $J = 8.1$  Hz,  $J = 6.3$  Hz), 3.65-3.70 (m, 1H), 7.15-7.53 (m, 10H). Major isomer: MS  $m/z$ : 236 ( $\text{M}^+$  (24)), 218 (10), 193 (4), 180 (9), 164 (38), 151 (29), 135 (100), 123 (17), 110 (96), 91 (48), 77 (51), 65

(56), 43 (94). Minor isomer. MS m/z: 236 ( $M^+$ (17)), 218 (7), 203 (2), 180 (6), 164 (24), 145 (14), 135 (78), 109 (100), 91 (45), 65 (60), 43 (96).

**1-(2-isopropyl-1-(phenylthio)cyclopropyl)(phenyl)methanol 6b** Inseparable 94:6 mixture of two isomers. Colourless oil. Yield 92%. IR (neat): 3400  $\text{cm}^{-1}$ . Major isomer:  $^1\text{H}$  NMR ( $\text{CDCl}_3$ )  $\delta$ : 0.74 (dd, 1H,  $J = 5.1$  Hz,  $J = 6.6$  Hz), 0.85-0.95 (m, 1H), 0.93 (d, 3H,  $J = 4.8$  Hz), 0.95 (d, 3H,  $J = 4.8$  Hz), 1.05 (dd, 1H,  $J = 5.1$  Hz,  $J = 8.7$  Hz), 1.57-1.63 (m, 1H), 2.79 (d, 1H,  $J = 4.2$  Hz), 4.67 (d, 1H,  $J = 4.2$  Hz), 7.21-7.54 (m, 10H).  $^{13}\text{C}$  NMR ( $\text{CDCl}_3$ )  $\delta$ : 21.22, 22.09, 22.66, 29.94, 31.42, 39.35, 78.00, 126.19, 126.94, 127.83, 127.97, 128.89, 129.64, 136.11, 140.24. MS m/z: 248 ( $M^+$ (34)), 280 (12), 242 (10), 226 (21), 191 (13), 155 (16), 135 (54), 116 (76), 77 (100). Minor isomer: Spectral data worked out by reaction mixture:  $^1\text{H}$  NMR ( $\text{CDCl}_3$ )  $\delta$ : 0.64 (dd, 1H,  $J = 5.1$  Hz,  $J = 6.9$  Hz), 0.94 (d, 3H,  $J = 4.8$  Hz), 0.95 (d, 3H,  $J = 4.8$  Hz), 0.99 (dd, 1H,  $J = 6.9$  Hz,  $J = 8.7$  Hz), 1.46 (dd, 1H,  $J = 5.4$  Hz,  $J = 9.0$  Hz), 1.57-1.63 (m, 1H), 2.29 (d, 1H,  $J = 4.2$  Hz), 4.64 (d, 1H,  $J = 4.2$  Hz), 7.21-7.54 (m, 10H). MS m/z: 248 ( $M^+$ (28)), 280 (10), 253 (80), 226 (16), 191 (14), 147 (36), 115 (68), 77 (100).

**1-(2-phenylethyl-1-(phenylthio)cyclopropyl)ethanol 6c**

Inseparable 70/30 *syn/anti* mixture. Colourless oil. Yield 85%. IR (neat): 3400  $\text{cm}^{-1}$ .  $^1\text{H}$  NMR ( $\text{CDCl}_3$ )  $\delta$ : 0.61-0.65 (m, 1H), 1.15-1.22 (m, 4H), 1.24 (d, 6H,  $J = 6.3$  Hz), 1.57 (br s, 1H), 1.83 (d, 1H,  $J = 5.7$  Hz), 1.91-2.02 (m, 5H), 2.67-2.75 (m, 4H), 3.39-3.44 (m, 1H), 3.60-3.64 (m, 1H), 7.11-7.48 (m, 10H). Major isomer: MS m/z: 298 ( $M^+$ (6)), 280 (3), 253 (1), 189 (5), 171 (13), 145 (10), 110 (26), 91 (100). Minor isomer: MS m/z: 298 ( $M^+$ (6)), 280 (3), 253 (8), 189 (5), 171 (13), 145 (10), 110 (26), 91 (100).

**1-(2-phenyl-1-(phenylthio)cyclopropyl)ethanol 6d**

Inseparable 90:10 mixture of two isomers. Colourless oil. Yield 80%. IR (neat): 3400  $\text{cm}^{-1}$ . Major isomer:  $^1\text{H}$  NMR ( $\text{CDCl}_3$ )  $\delta$ : 1.34 (d, 3H,  $J = 6.3$  Hz), 1.48 (dd, 1H,  $J = 6.3$  Hz,  $J = 6.9$  Hz), 1.93 (dd, 1H,  $J = 6.3$  Hz,  $J = 8.7$  Hz), 2.09 (d, 1H,  $J = 6.9$  Hz), 2.51 (dd, 1H,  $J = 7.2$  Hz,  $J = 9.0$  Hz), 3.71 (m, 1H), 7.14-7.35 (m, 10H).

Minor isomer: Spectral data worked out by reaction mixture:  $^1\text{H}$  NMR ( $\text{CDCl}_3$ )  $\delta$ : 1.41 (d, 3H,  $J = 6.3$  Hz), 1.50-1.54 (m, 1H), 1.72 (dd, 1H,  $J = 5.4$  Hz,  $J = 9.3$  Hz), 1.86 (d, 1H,  $J = 5.4$  Hz), 2.56 (dd, 1H,  $J = 6.3$  Hz,  $J = 8.7$  Hz), 3.90 (m, 1H), 7.14-7.35 (m, 10H). MS m/z, identical for the two isomers: 270 ( $M^+$ (6)), 252 (5), 219 (4), 101 (4), 164 (72), 143 (62), 115 (100), 77 (41), 91 (58), 65 (35).

**1-(2-phenylethyl-1-(phenylthio)cyclopropyl)pentan-1-ol 6e** Inseparable 60/40 *syn/anti* mixture. Yellow oil. Yield 86%. IR (neat): 3380  $\text{cm}^{-1}$ .  $^1\text{H}$  NMR ( $\text{CDCl}_3$ )  $\delta$ : 0.58 (t, 3H,  $J = 5.7$  Hz), 0.84-0.89 (m, 4H), 0.91 (t, 3H,  $J = 6.6$  Hz), 1.08-1.70 (m, 14H), 1.85-2.04 (m, 2H), 2.63-2.81 (m, 2H), 3.07 (t, 1H,  $J = 6.6$  Hz), 3.32 (dd, 1H,  $J = 3.3$  Hz,  $J = 9.3$  Hz), 7.12-7.50 (m, 10H). MS m/z, identical for the two isomers: 340 ( $M^+$ (4)), 322 (3), 279 (5), 253 (6), 231 (2), 175 (5), 145 (12), 129 (14), 110 (26), 91 (100).

**1-(2-methyl-1-(phenylthio)cyclopropyl)pentan-1-ol 6f**

Inseparable 60/40 *syn/anti* mixture. Yellow oil. Yield 70%. IR (neat): 3380  $\text{cm}^{-1}$ .  $^1\text{H}$  NMR ( $\text{CDCl}_3$ )  $\delta$ : 0.87 (t, 3H,  $J = 6.9$  Hz), 0.89 (t, 3H,  $J = 6.9$  Hz), 0.93-1.78 (m, 1H), 1.10-1.16 (m, 1H), 1.19-1.57 (m, 16H), 1.29 (d, 6H), 1.60-1.78 (m, 2H), 3.11-3.18 (m, 1H), 3.31-3.38 (m, 1H), 7.11-7.48 (m, 10H). MS m/z, identical for the two isomers: 250 ( $M^+$ (38)), 232 (6), 217 (8), 189 (39), 163 (24), 135 (38), 110 (100), 93 (34), 77 (32).

**1-(2-furan-2-yl)-1-(phenylthio)cyclopropyl)ethanol 6g**

Inseparable 65:35 *syn/anti* mixture. Yellow oil. Yield 94%. IR (neat): 3400  $\text{cm}^{-1}$ .  $^1\text{H}$  NMR ( $\text{CDCl}_3$ )  $\delta$ : 1.33 (d, 6H,  $J = 6.3$  Hz), 1.35-1.38 (m, 1H), 1.42 (dd, 2H,  $J = 5.4$  Hz,  $J = 6.9$  Hz), 1.59 (dd, 1H,  $J = 5.4$  Hz,  $J = 9.3$  Hz), 1.66 (dd, 1H,  $J = 5.4$  Hz,  $J = 9.3$  Hz), 2.00 (br s, 2H), 2.45-2.51 (m, 2H), 3.69 (q, 1H,  $J = 6.3$  Hz), 3.84 (q, 1H,  $J = 6.3$  Hz), 6.06 (d, 1H,  $J = 3.0$  Hz), 6.10 (d, 1H,  $J = 3.6$  Hz), 6.30-6.34 (m, 2H), 7.12-7.34 (m, 12H). MS m/z, identical for the two isomers: 260 ( $M^+$ (5)), 242 (3), 215 (5), 166 (12), 151 (24), 134 (9), 109 (100), 94 (24), 77 (88).

**General method for the synthesis of 6h-j.**

To a stirred solution of the ketone **2b** or **2c** (3.38 mmol) in THF methyl lithium (1.6 M in diethyl ether, 2.54 mL, 4.05 mmol) or n-butyl lithium (1.6 M in hexane, 2.54 mL, 4.05 mmol) was added at  $-78$  °C. The resulting mixture was stirred and warmed to room temperature over 16 h and then diluted with diethyl ether, quenched with saturated aqueous  $\text{NH}_4\text{Cl}$ . The organic layer was dried over  $\text{Na}_2\text{SO}_4$ , filtered and concentrated in vacuo. Flash chromatography (light petroleum /diethyl ether, 5/1) provided **6h-j**.

**1-(2-isopropyl-1-(phenylthio)cyclopropyl)-1-phenylethanol 6h** Mixture 94:6 of two inseparable diastereoisomers. Yield 86%. IR (neat): 3440  $\text{cm}^{-1}$ . Major isomer:  $^1\text{H}$  NMR ( $\text{CDCl}_3$ )  $\delta$ : 0.44 (dd, 1H,  $J = 6.6$  Hz,  $J = 5.7$  Hz), 1.05 (d, 3H,  $J = 6.6$  Hz), 1.07 (d, 3H,  $J = 6.6$  Hz), 1.30 (dd, 1H,  $J = 6.6$  Hz,  $J = 9.6$  Hz), 1.60 (dd, 1H,  $J = 5.4$  Hz,  $J = 9.3$  Hz), 1.62-1.67 (m, 1H), 1.63 (s, 3H), 2.62 (br s, 1H), 7.05-7.60 (m, 10H).  $^{13}\text{C}$  NMR ( $\text{CDCl}_3$ )  $\delta$ : 17.85, 22.06, 22.51, 26.52, 30.46, 33.84, 43.98, 76.25, 125.69, 126.08, 126.93, 127.71, 128.31, 129.83, 136.94, 146.73. MS m/z: 312 ( $M^+$ (12)), 294 (5), 256 (4), 240 (16), 192 (58), 149 (100), 121 (84), 105 (29), 91 (42), 77 (52). Minor isomer: MS m/z: 312 ( $M^+$ (22)), 296 (5), 256 (1), 240 (16), 210 (5), 192 (33), 149 (62), 121 (78), 105 (42), 91 (65), 77 (100).

**2-(2-phenethyl-1-(phenylthio)cyclopropyl)propan-2-ol 6i**

Yellow oil. Yield 66%. IR (neat): 3440  $\text{cm}^{-1}$ .  $^1\text{H}$  NMR ( $\text{CDCl}_3$ )  $\delta$ : 0.47 (t, 1H,  $J = 6.0$  Hz), 1.21 (s, 3H), 1.24-1.30 (m, 1H), 1.34 (s, 3H), 1.43 (dd,  $J = 6.0$  Hz,  $J = 9.3$  Hz), 1.92-1.97 (m, 2H), 2.62-2.76 (m, 2H), 7.12-7.46 (m, 10H).  $^{13}\text{C}$  NMR  $\delta$ : 19.13, 24.45, 25.97, 28.71, 32.69, 35.82, 42.32, 73.34, 125.57, 125.74, 128.26, 128.34, 128.54, 129.07, 137.39, 142.10. MS m/z: 312 ( $M^+$ (12)), 294 (6), 254 (7),

178 (12), 145 (13), 129 (11), 110 (37), 91 (100), 77 (18). Anal. Calcd. for C<sub>20</sub>H<sub>24</sub>OS: C, 76.88; H, 7.74; S, 10.26. Found: C, 76.82; H, 7.72; S, 10.35.

**1-(2-isopropyl-1-(phenylthio)cyclopropyl)-1-phenylpentan-1-ol 6j** Colourless oil. Yield 92 %. IR (neat): 3440cm<sup>-1</sup>. <sup>1</sup>H NMR (CDCl<sub>3</sub>) δ: 0.30(dd, 1H, *J* = 5.7 Hz, *J* = 6.9 Hz), 0.83 (t, 3H, *J* = 6.9 Hz), 0.81-0.95 (m, 2H), 0.99 (d, 3H, *J* = 6.6 Hz), 1.01 (d, 3H, *J* = 6.6 Hz), 1.24-1.33 (m, 3H), 1.50-1.59 (m, 2H), 1.60-1.79 (m, 1H), 2.05-2.15 (m, 1H), 2.46 (br s, 1H), 6.93-7.51 (m, 10H). <sup>13</sup>C NMR δ: 14.01, 17.67, 22.04, 22.51, 23.14, 25.83, 30.52, 33.94, 37.31, 44.75, 78.39, 125.46, 126.73, 126.77, 127.68, 128.31, 129.33, 137.33, 144.59. MS *m/z*: 354 (M<sup>+</sup> (40)), 336 (4), 293 (7), 241 (9), 192 (91), 164 (98), 149 (100), 130 (38), 115 (24), 109 (30), 91 (52), 77 (45). Anal. Calcd. for C<sub>23</sub>H<sub>30</sub>OS: C, 77.92; H, 8.53; S, 9.04. Found: C, 77.84; H, 8.62; S, 9.15.

### **Rearrangement of cyclopropyl carbinols 6a,c to ketones 10a,c.**

To a solution of cyclopropylcarbinol **6a,c** (1.5 mmol) in 10 mL of methylene chloride was added anhydrous stannic chloride (391 mg 1.2 mmol). After stirring for 1h, water was added followed by ether (20 mL). The organic layer was washed with saturated sodium bicarbonate solution, dried (Na<sub>2</sub>SO<sub>4</sub>) and the solvents removed in vacuo. The residue was chromatographed on silica gel with diethyl ether-light petroleum 1:10 as eluent.

#### **5-Chloro-6-methylheptan-2-one 10a**

Yellow oil. Yield 65 %. IR (neat): 1760cm<sup>-1</sup>. <sup>1</sup>H NMR (CDCl<sub>3</sub>) δ: 0.97 (d, 3H, *J* = 6.6 Hz), 1.03 (d, 3H, *J* = 6.6 Hz), 1.05 (t, 3H, *J* = 7.5 Hz), 1.95-2.07 (m, 1H), 2.51 (q, 2H, *J* = 7.5 Hz), 2.65 (dd, 1H, *J* = 3.9 Hz, *J* = 16.5 Hz) 2.91 (dd, 1H, *J* = 9.6 Hz, *J* = 16.5 Hz) 4.31-4.37 (m, 1H). <sup>13</sup>C NMR δ: 7.49, 17.24, 19.70, 34.05, 37.07, 47.89, 63.56, 208.67. MS *m/z*: 126 (M<sup>+</sup>-36 (14)), 97 (18), 72 (48), 57 (100). Anal. Calcd. for C<sub>8</sub>H<sub>15</sub>ClO: C, 59.07; H, 9.29. Found: C, 59.14; H, 9.22.

#### **5-chloro -7-phenyl-heptan-3-one 10c**

Yellow oil. Yield 90 %. IR (neat): 1760cm<sup>-1</sup>. <sup>1</sup>H NMR (CDCl<sub>3</sub>) δ: 1.05 (t, 3H, *J* = 6.3 Hz), 1.96-2.08 (m, 2H), 2.44 (q, 2H, *J* = 7.2 Hz), 2.69-2.79 (m, 2H), 2.88 (dd, 1H, *J* = 8.7 Hz, *J* = 5.1 Hz), 2.96 (dd, 1H, *J* = 8.1 Hz, *J* = 16.8 Hz), 4.31-4.35 (m, 1H), 7.18-7.30 (m, 5H). <sup>13</sup>C NMR δ: 7.43, 32.58, 36.87, 39.77, 50.58, 56.80, 126.12, 128.46, 128.49, 129.02, 140.68, 207.64. MS *m/z*: 224 (M<sup>+</sup> (1)), 189 (15), 159 (13), 117 (19), 91 (100), 77 (9), 57 (45). Anal. Calcd. for C<sub>13</sub>H<sub>17</sub>ClO: C, 69.48; H, 7.62. Found: C, 69.34; H, 7.52.

### **Rearrangement of cyclopropyl carbinols 6a,c to ketones 11c,f,g.**

A stirred solution of cyclopropylcarbinol **6c,f,g** (1.2 mmol) and *p*-toluenesulfonic acid (20 mg, 1.2 mmol,) in dry benzene (10 mL) was refluxed for 1 h. After cooling to room temperature, the benzene solution was washed with 10 % NaHCO<sub>3</sub> and with brine, dried (Na<sub>2</sub>SO<sub>4</sub>) and evaporated to remove the solvent. The residue was chromatographed on silica gel with diethyl ether-light petroleum 1:10 as eluent.

#### **7-phenyl-5-(phenylthio)heptan-3-one 11c**

Yellow oil. Yield 65 %. IR (neat): 1760 cm<sup>-1</sup>. <sup>1</sup>H NMR (CDCl<sub>3</sub>) δ: 1.01 (t, 3H, *J* = 7.2 Hz), 1.81-1.98 (m, 2H), 2.36 (q, 2H, *J* = 7.2 Hz), 2.64-2.86 (m, 4H), 3.58-3.64 (m, 1H), 7.14-7.41 (m, 10H). <sup>13</sup>C NMR δ: 7.57, 33.08, 36.42, 36.65, 43.44, 47.85, 125.92, 127.18, 128.39, 128.94, 132.34, 134.25, 141.39, 209.18. MS *m/z*: 298 (M<sup>+</sup> (37)), 207 (3), 188 (12), 159 (14), 131 (17), 109 (38), 91 (100), 77 (18). Anal. Calcd. for C<sub>13</sub>H<sub>22</sub>OS: C, 76.47; H, 7.43; S, 10.74. Found: C, 76.44; H, 7.52; S, 10.65.

#### **2-(phenylthio)-nonan-4-one 11f**

Yellow oil. Yield 70 %. IR (neat): 1760 cm<sup>-1</sup>. <sup>1</sup>H NMR (CDCl<sub>3</sub>) δ: 0.88 (t, 3H, *J* = 6.9 Hz), 1.21-1.35 (m, 4H), 1.28 (d, 3H, *J* = 4.8 Hz), 1.49-1.61 (m, 2H), 2.36 (t, 2H, *J* = 6.9 Hz), 2.53 (dd, 1H, *J* = 8.7 Hz, *J* = 16.8 Hz), 2.72 (dd, 1H, *J* = 8.7 Hz, *J* = 5.4 Hz), 3.66-3.77 (m, 1H), 7.21-7.42 (m, 5H). <sup>13</sup>C NMR δ: 13.85, 21.01, 22.38, 23.29, 31.28, 38.23, 43.51, 49.36, 127.13, 128.89, 132.20, 134.35, 208.99. MS *m/z*: 250 (M<sup>+</sup> (70)), 194 (4), 179 (6), 152 259, 137 (52), 109 (62), 99 (100), 71 (58). Anal. Calcd. for C<sub>15</sub>H<sub>22</sub>OS: C, 71.35; H, 8.86; S, 12.80. Found: C, 71.44; H, 8.73; S, 12.75.

#### **1-furan-2-yl-1-phenylsulfenyl-pentan-3-one 11g.**

Yellow oil. Yield 68 %. IR (neat): 1760 cm<sup>-1</sup>. <sup>1</sup>H NMR (CDCl<sub>3</sub>) δ: 0.99 (t, 3H, *J* = 7.2 Hz), 2.37 (q, 2H, *J* = 7.2 Hz), 2.93 (dd, 1H, *J* = 8.7 Hz, *J* = 17.1 Hz), 3.06 (dd, 1H, *J* = 8.1 Hz, *J* = 16.8 Hz), 5.92 (d, 1H, *J* = 3.3 Hz), 6.18-6.20 (m, 1H), 7.08-7.48 (m, 6H). <sup>13</sup>C NMR δ: 7.54, 36.55, 41.37, 45.58, 107.24, 110.26, 128.01, 128.74, 128.99, 133.72, 141.88, 153.23, 207.68. MS *m/z*: 260 (M<sup>+</sup> (4)), 151 (31), 135 (3), 109 (34), 94 (18), 77 (6), 57 (100). Anal. Calcd. for C<sub>15</sub>H<sub>16</sub>O<sub>2</sub>S: C, 69.20; H, 6.19; S, 12.31. Found: C, 69.34; H, 6.23; S, 12.35.

## **General procedure for the synthesis of 3a-d,i.**

To an ice-cooled solution containing **2a-d,i** (1 mmol) in 30 mL of CH<sub>2</sub>Cl<sub>2</sub> was added m-chloroperbenzoic acid (344 mg, 2 mmol) in small portions. After the addition was complete, the solution was stirred at room temperature for 16 h and then it was diluted with CH<sub>2</sub>Cl<sub>2</sub> and washed with a saturated NaHCO<sub>3</sub> solution. The organic layer was dried over Na<sub>2</sub>SO<sub>4</sub> and concentrated under reduced pressure and the residue was chromatographed on silica gel using light petroleum-diethyl ether (1:1) as eluent to give **3a-d,i**. Spectral data of the compounds **3a,d,i** has been previously reported.<sup>1,2</sup>

**(2-isopropyl-1-(phenylsulfonyl)cyclopropyl)(phenyl)methanone 3b** White solid, mp 106-108°C. Yield 96 %. IR (neat): 1150, 1310, 1660 cm<sup>-1</sup>. <sup>1</sup>H NMR (CDCl<sub>3</sub>) δ: 1.12 (d, 3H, *J* = 6.9 Hz), 1.42 (d, 3H, *J* = 6.9 Hz), 1.47-1.52 (m, 1H), 1.85 (dd, 1H, *J* = 5.1 Hz, *J* = 7.8 Hz), 2.43 (dt, 1H, *J* = 5.1 Hz, *J* = 9.6 Hz), 2.47-2.52 (m, 1H), 7.37-7.97 (m, 10H). <sup>13</sup>C NMR δ: 18.95, 22.90, 22.99, 27.61, 39.49, 56.49, 127.92, 128.28, 128.65, 130.24, 133.44, 133.54. MS *m/z*: 328 (M<sup>+</sup> (2)), 273 (18), 221 (3), 195 (10), 171 (18), 141 (5), 125 (7), 105 (86), 77 (100). Anal. Calcd. for C<sub>19</sub>H<sub>20</sub>O<sub>3</sub>S: C, 69.49; H, 6.14; S, 9.76. Found: C, 69.54; H, 6.22; S, 9.66.

### **1-(2-phenethyl-1-(phenylsulfonyl)cyclopropyl)ethanone 3c**

Yellow oil. Yield 98 %. IR (neat): 1150, 1310, 1690 cm<sup>-1</sup>. <sup>1</sup>H NMR (CDCl<sub>3</sub>) δ: 1.59-1.69 (m, 1H), 1.92 (dd, 1H, *J* = 5.1 Hz, *J* = 8.4 Hz), 2.02 (dd, 1H, *J* = 5.1 Hz, *J* = 9.3 Hz), 2.23 (s, 3H), 2.31-2.49 (m, 2H), 2.79-2.97 (m, 2H), 7.17-7.92 (m, 10H). <sup>13</sup>C NMR δ: 21.53, 28.39, 28.86, 34.04, 35.64, 56.98, 1.26, 127.74, 128.46, 128.56, 129.19, 133.65, 140.89, 141.10, 198.72. MS *m/z*: 328 (M<sup>+</sup> (2)), 287(13), 237 (2), 211 (41), 186 (15), 171 (3), 147 (2), 130 (14), 115 (18), 91 (100), 78 (60), 65 (27). Anal. Calcd. for C<sub>19</sub>H<sub>20</sub>O<sub>3</sub>S: C, 69.49; H, 6.14; S, 9.76. Found: C, 69.34; H, 6.12; S, 9.85.

## **General method for reduction of the ketones 3a,b**

To a stirred solution of the ketones **3a,b** (6.23 mmol) in dry THF (30 mL) cooled at -78°C, a solution of LiAlH<sub>4</sub> (2.0 M in THF, 4.67 mL, 9.35 mmol) was added dropwise. The mixture was stirred for 1h. The resulting mixture was treated with wet Na<sub>2</sub>SO<sub>4</sub>, diluted with diethyl ether and filtered. The organic layer was washed with brine, dried (Na<sub>2</sub>SO<sub>4</sub>) and evaporated. The residue was purified by column chromatography (silica gel; AcOEt/hexane 1:9) to give a *syn/anti* mixture of the products, the ratio of which was determined by <sup>1</sup>H NMR analysis and GC MS.

**1-(1*R*\*,2*S*\*)-2-isopropyl-1-(phenylsulfonyl)cyclopropyl)ethanol 14a** Separable 70:30 mixture of two *syn/anti* diastereoisomers. Colourless oil. Yield 82 %. IR (neat): 1140, 1290, 3500 cm<sup>-1</sup>.

Minor isomer: <sup>1</sup>H NMR (CDCl<sub>3</sub>) δ: 1.01 (d, 3H, *J* = 6.6 Hz), 1.06 (d, 3H, *J* = 6.6 Hz), 1.17 (d, 3H, *J* = 6.3 Hz), 1.21 (dd, 1H, *J* = 6.6 Hz, *J* = 3.3 Hz), 1.37 (dd, 1H, *J* = 5.1 Hz, *J* = 9.3 Hz), 1.57 (dd, 1H, *J* = 8.1 Hz, *J* = 5.1 Hz), 1.94 (br s, 1H), 2.30-2.38 (m, 1H), 4.13 (q, 1H, *J* = 6.3 Hz), 7.54-7.92 (m, 5H). <sup>13</sup>C NMR δ: 17.11, 18.88, 23.02, 23.23, 26.46, 33.00, 50.92, 65.28, 128.36, 129.15, 133.52, 139.74. MS *m/z*: 268 (M<sup>+</sup> (1)), 253 (2), 213 (5), 195 (16), 143 (12), 125 (18), 108 (10), 93 (28), 77 (100). Anal. Calcd. for C<sub>14</sub>H<sub>20</sub>O<sub>3</sub>S: C, 62.66; H, 7.51; S, 11.95. Found: C, 62.52; H, 7.48; S, 11.86.

Major isomer: <sup>1</sup>H NMR (CDCl<sub>3</sub>) δ: 0.78 (d, 3H, *J* = 6.6 Hz), 1.10 (d, 3H, *J* = 6.6 Hz), 1.20 (dd, 1H, *J* = 9.0 Hz, *J* = 5.4 Hz), 1.21 (d, 3H, *J* = 6.6 Hz), 1.34 (dt, 1H, *J* = 10.2 Hz, *J* = 9.0 Hz), 1.58 (dd, 1H, *J* = 8.4 Hz, *J* = 5.4 Hz), 2.42-2.50 (m, 1H), 3.27 (br s, 1H), 4.12 (q, 1H, *J* = 6.6 Hz), 7.54-7.92 (m, 5H). <sup>13</sup>C NMR δ: 14.95, 20.87, 23.03, 23.43, 25.77, 34.65, 51.87, 65.02, 128.47, 129.11, 133.47, 140.18. MS *m/z*: 268 (M<sup>+</sup> (1)), 253 (2), 213 (10), 195 (26), 143 (32), 125 (34), 108 (12), 93 (38), 77 (100). Calcd. for C<sub>14</sub>H<sub>20</sub>O<sub>3</sub>S: C, 62.66; H, 7.51; S, 11.95. Found: C, 62.48; H, 7.42; S, 11.88.

### **(1*R*\*,2*S*\*)-2-isopropyl-1-(phenylsulfonyl)cyclopropyl (phenyl) methanol 14b**

Inseparable 70:30 mixture of two *syn/anti* diastereoisomers. Yellow oil. Yield 92 %. IR (neat): 1150, 1310, 1470, 3500 cm<sup>-1</sup>. <sup>1</sup>H NMR (CDCl<sub>3</sub>) δ: 0.54 (dd, 1H, *J* = 5.1 Hz, *J* = 9.3 Hz), 0.57-0.61 (m, 1H), 0.97 (d, 3H, *J* = 6.6 Hz), 1.10-1.23 (m, 2H), 1.25 (d, 3H, *J* = 6.6 Hz), 1.52 (dd, 1H, *J* = 5.1 Hz, *J* = 8.4 Hz), 1.72 (dd, 1H, *J* = 3.9 Hz, *J* = 6.3 Hz), 2.09-2.20 (m, 1H), 2.39-2.45 (m, 1H), 4.01 (d, 1H, *J* = 8.1 Hz), 4.32 (d, 1H, *J* = 10.6 Hz), 6.83-8.01 (m, 10H).

MS (identical for the two *syn/anti* diastereoisomers) *m/z*: 330 (M<sup>+</sup>(1)), 257 (3), 188 (4), 141 (16), 115 (25), 97 (8), 77 (100).

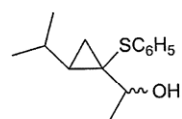

6a

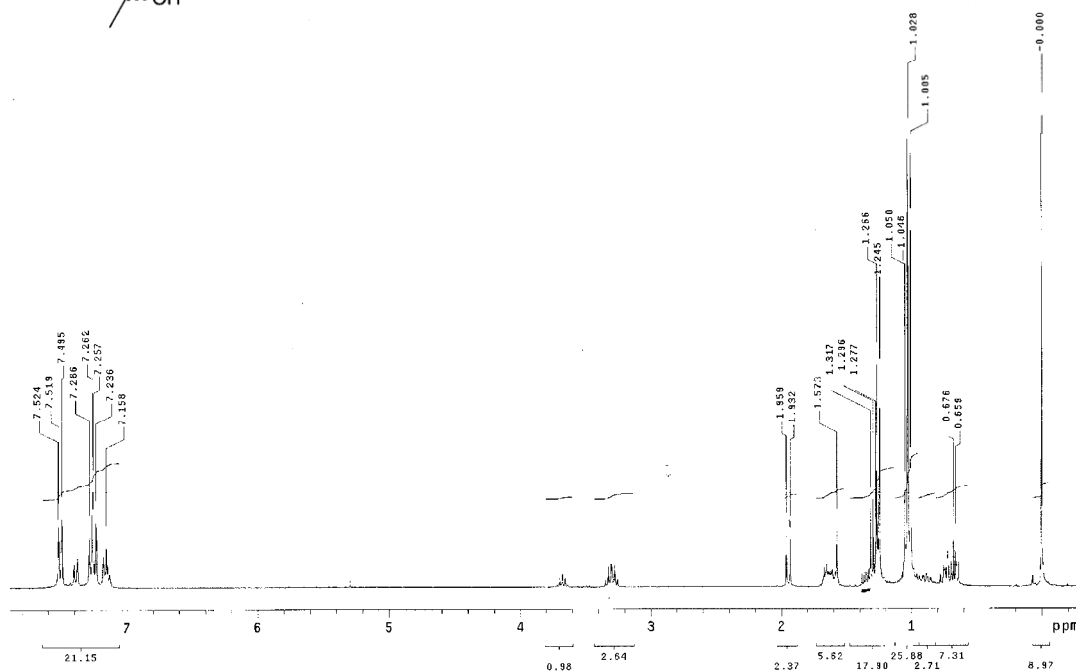

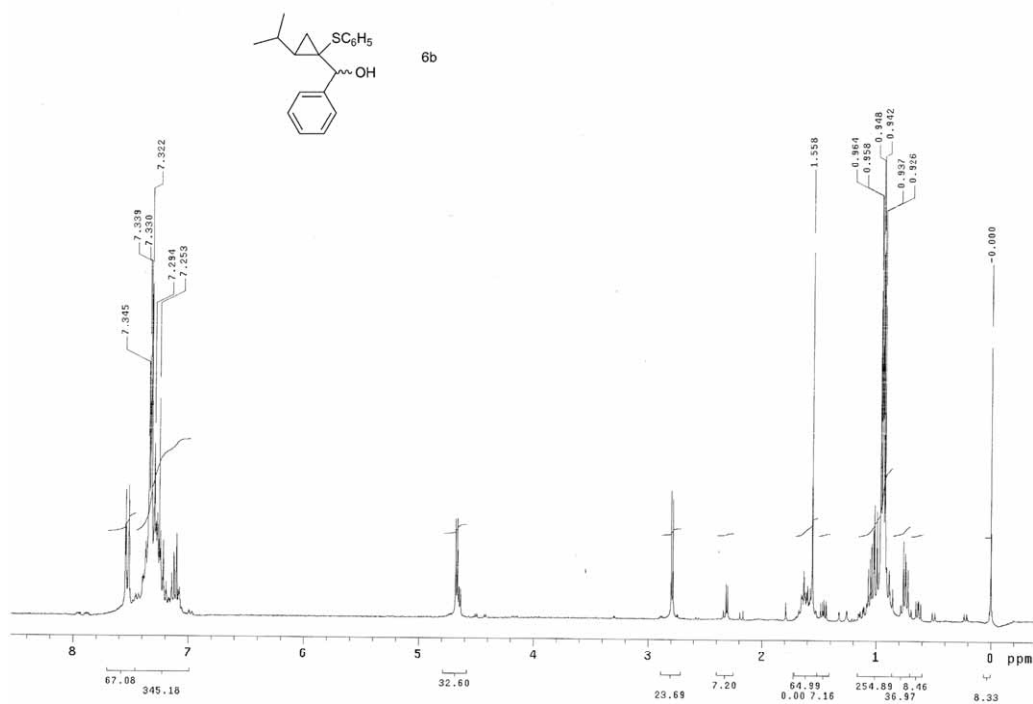

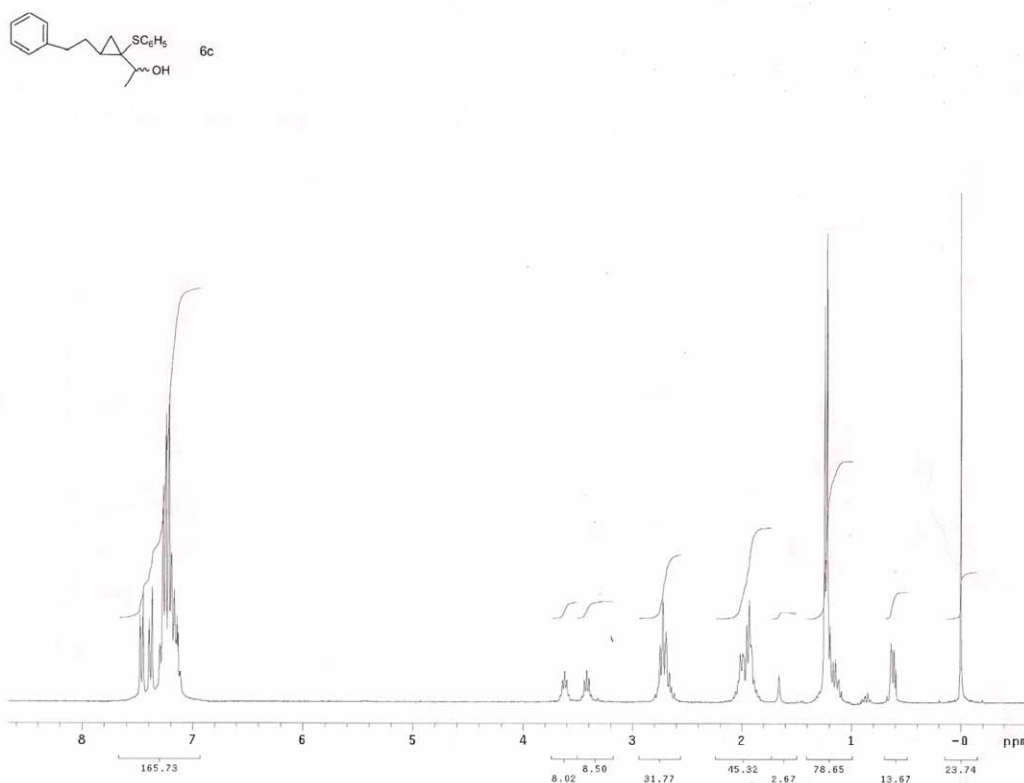



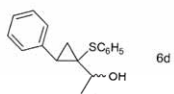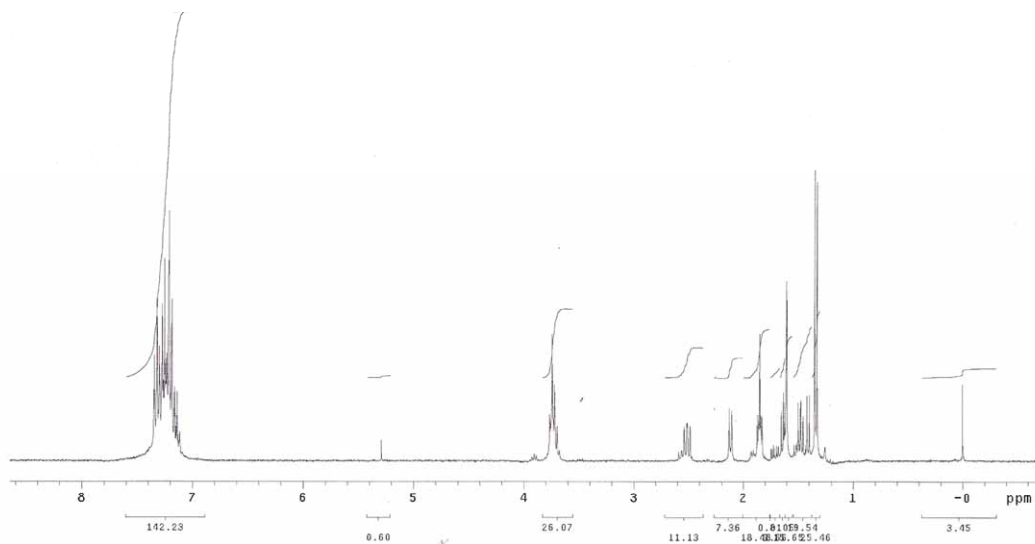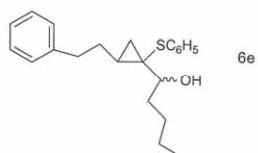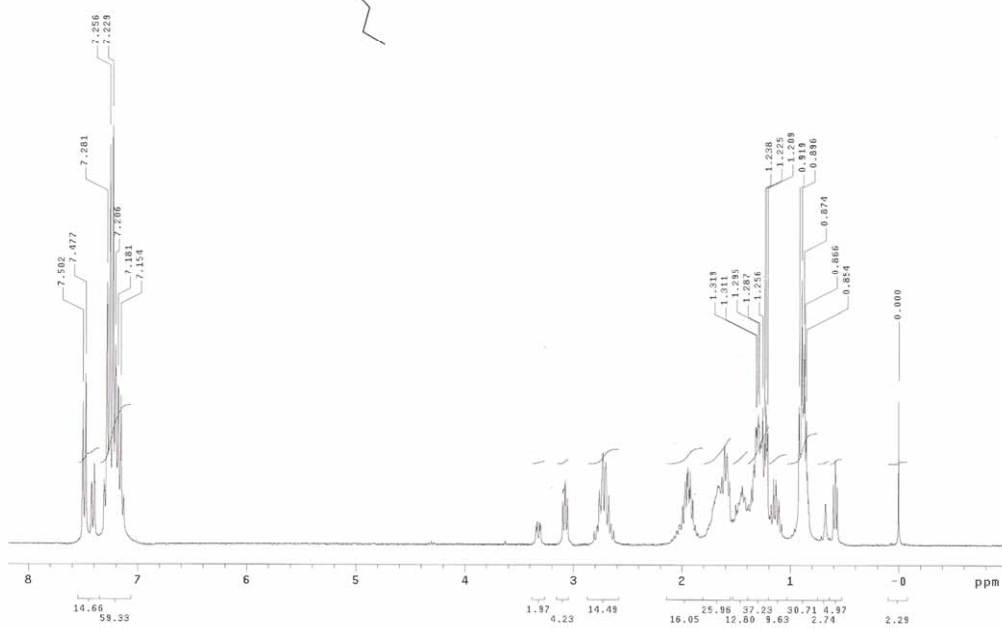

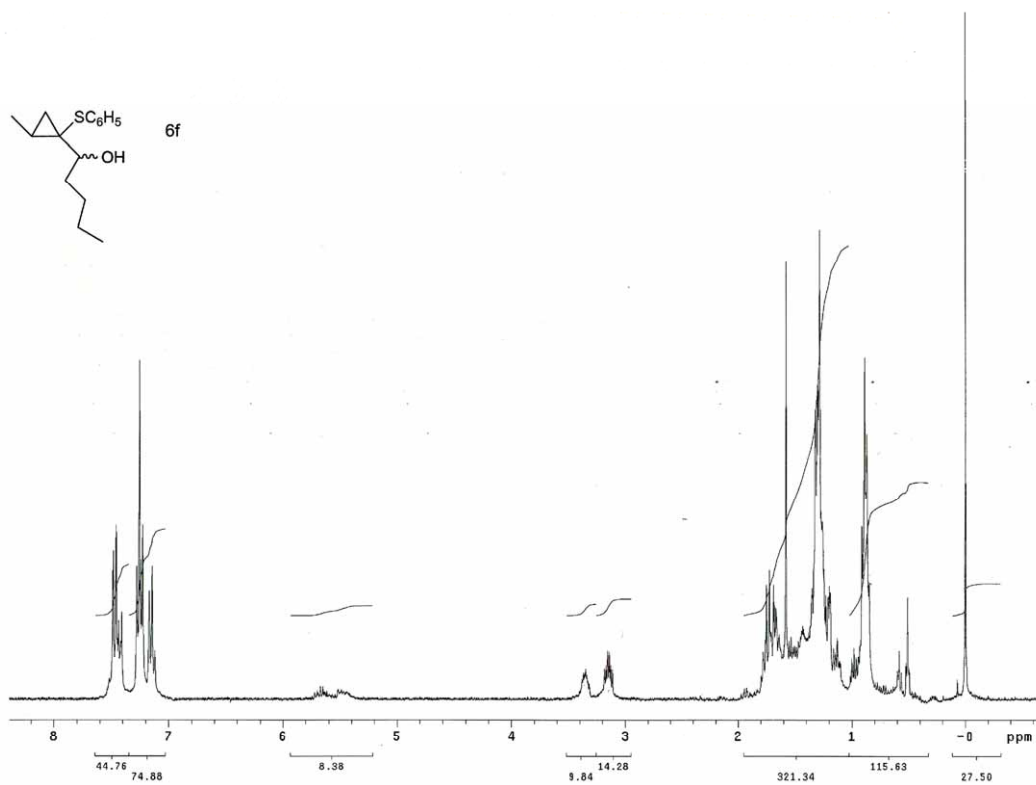

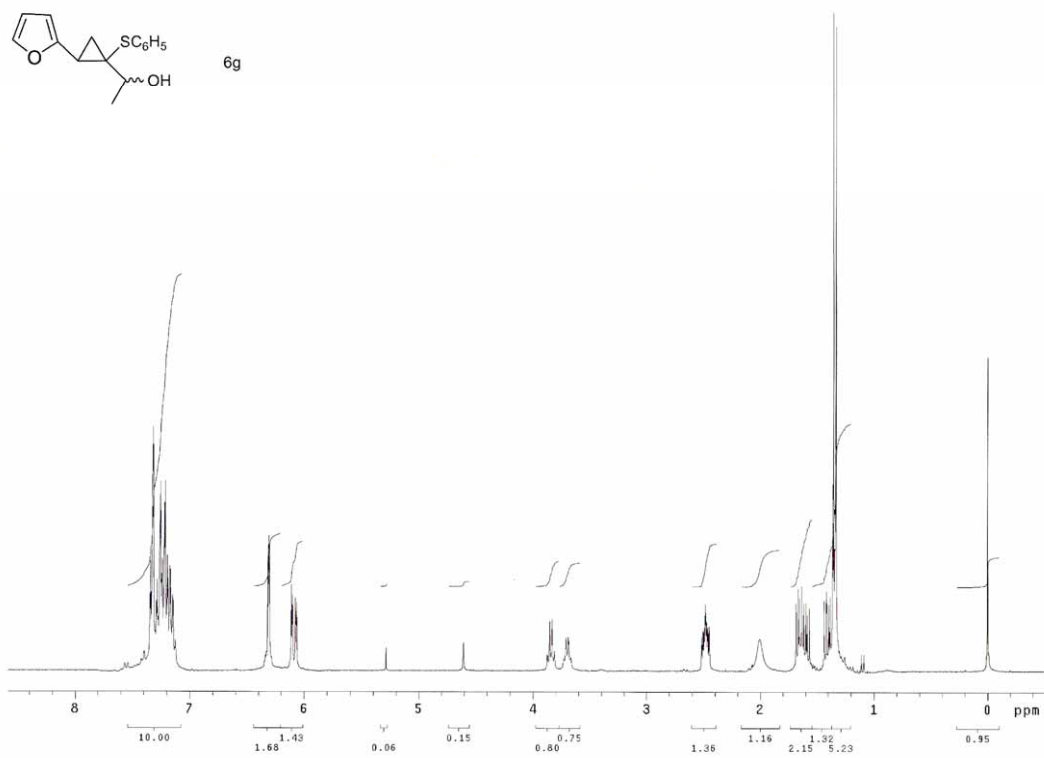

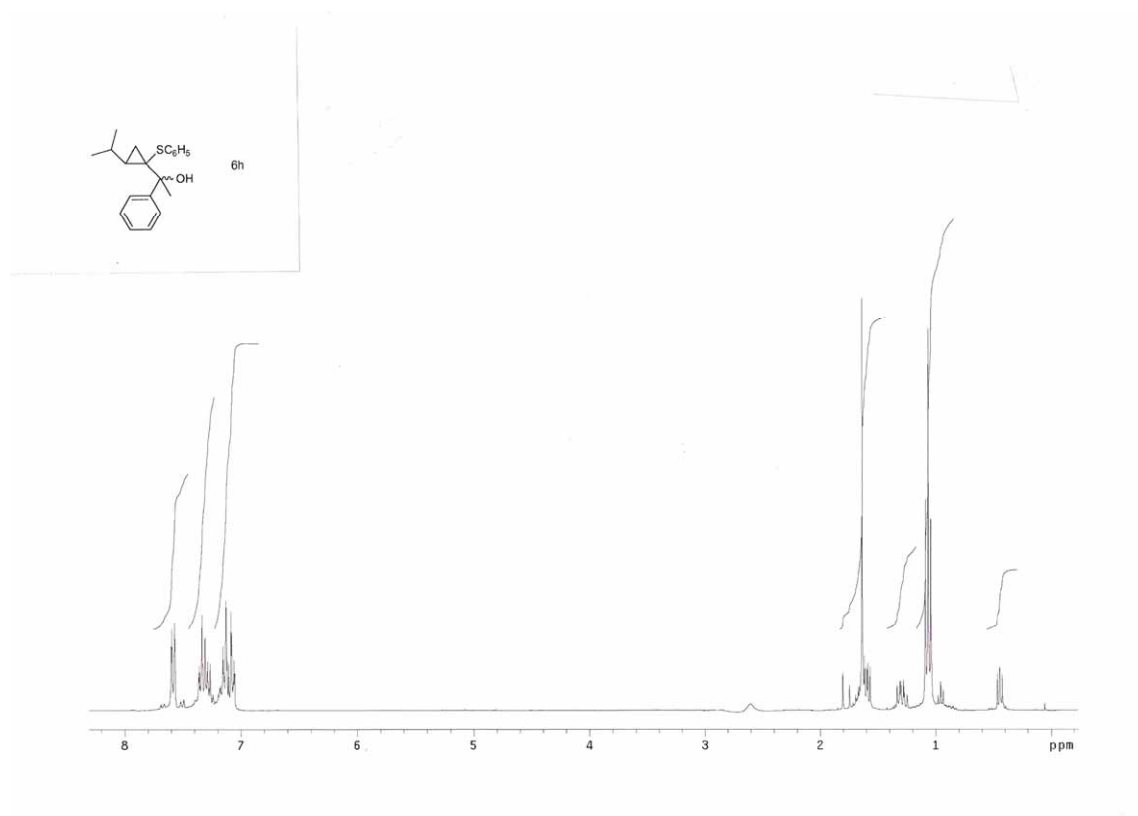

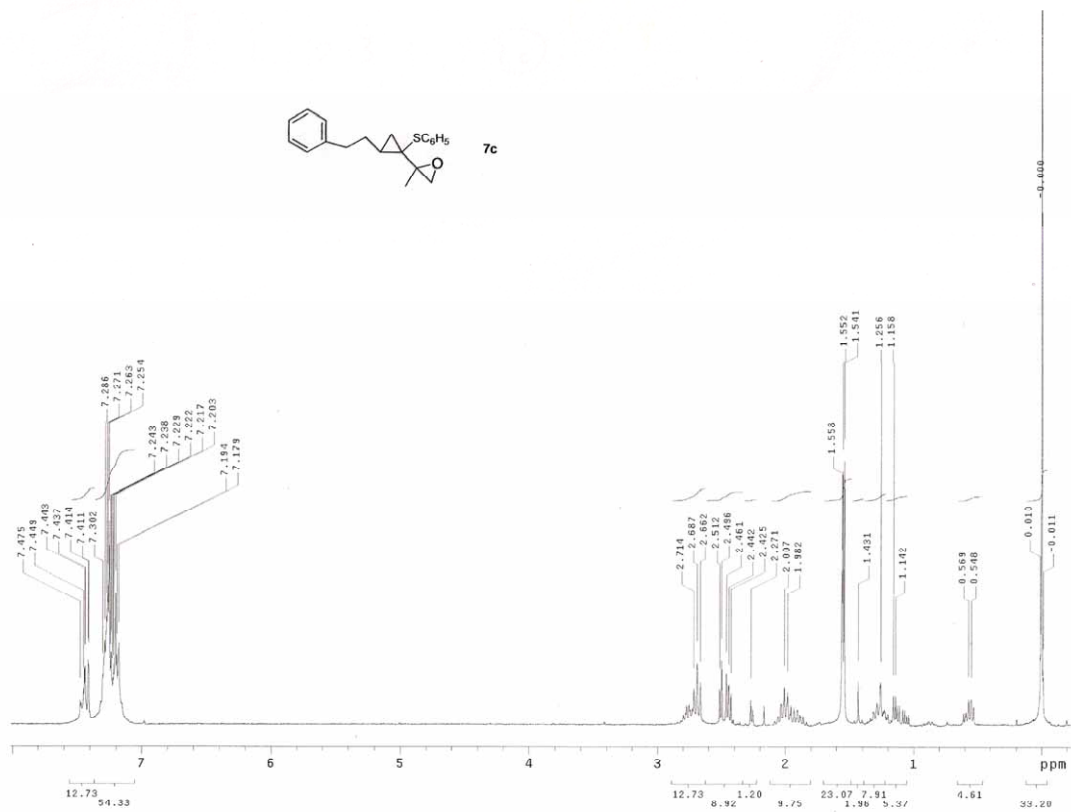

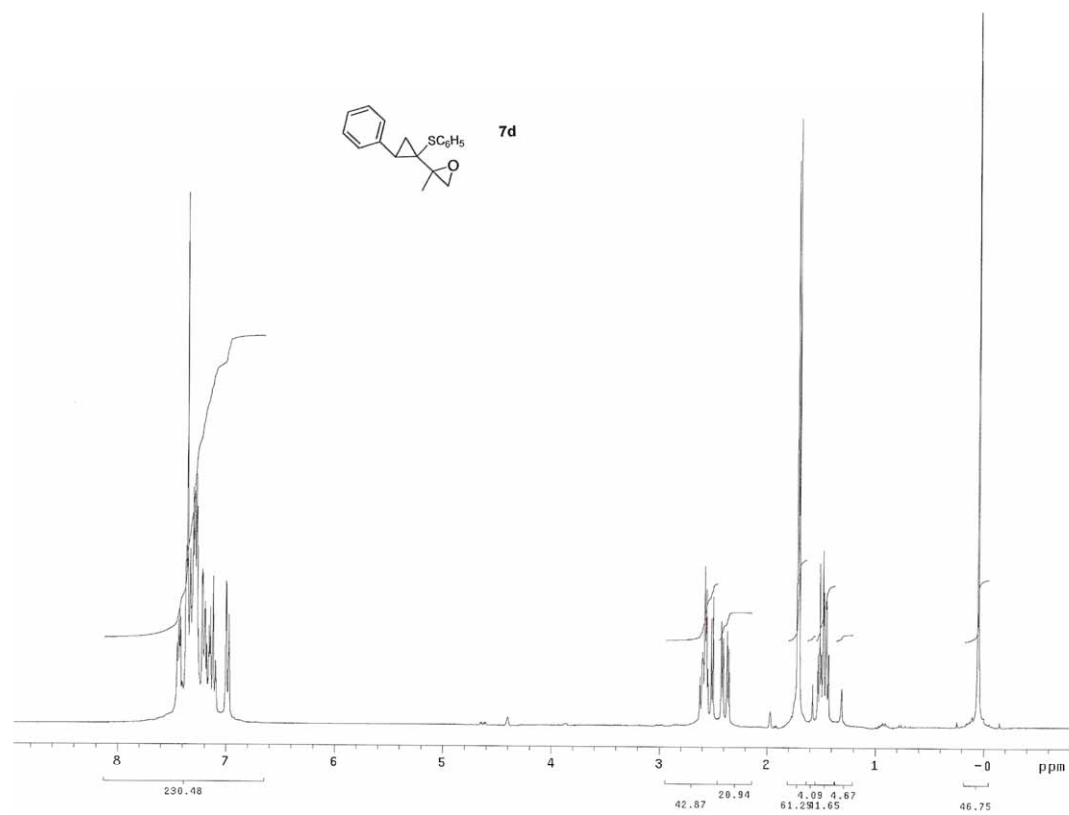

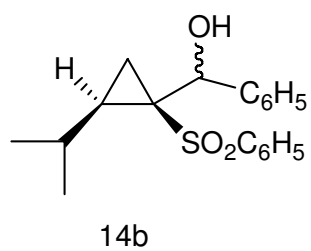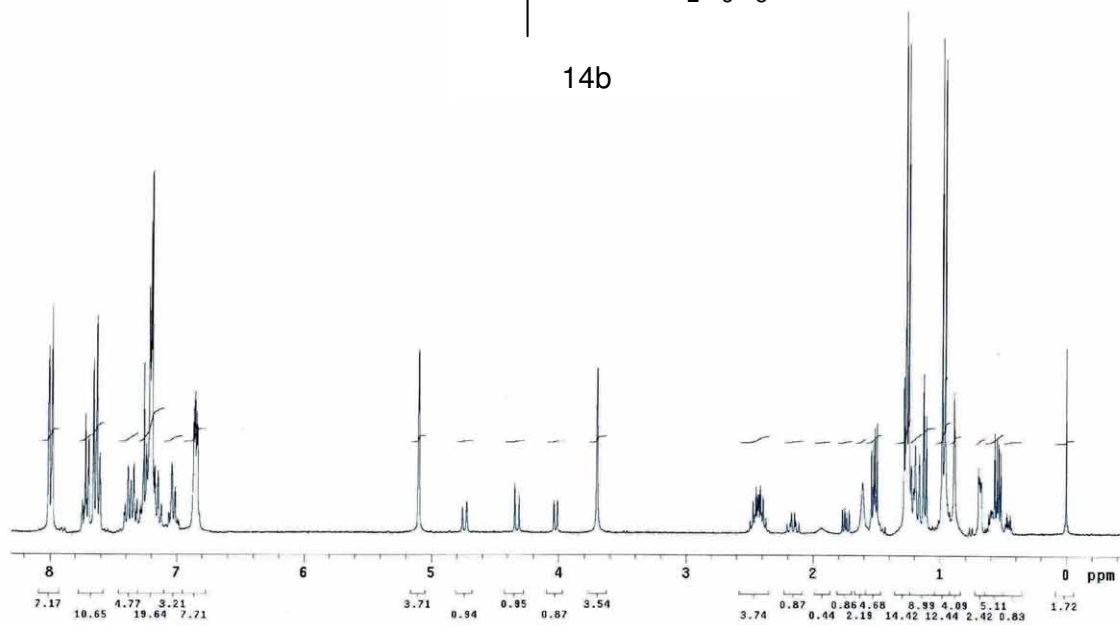

Supplement: b906695k.pdf [file b906695k.pdf]
